# Supplementary material for: Eu3+ ions as a crystal-field probe for low-symmetry sites in doped phosphors – a case study: Eu3+ at triclinic sites in Li6RE(BO3)3 (RE = Y, Gd), YBO3 and ZnO and at trigonal sites in YAl3(BO3)4
Source: Royal Society of Chemistry journal article supplement (doi:10.1039/d3cp03090c), 2023-01-01
Supplement: d3cp03090c1.pdf [file d3cp03090c1.pdf]

## Supplementary Information

### Eu<sup>3+</sup> ions as crystal-field probe for low-symmetry sites in doped phosphors – case study: Eu<sup>3+</sup> at triclinic sites in Li<sub>6</sub>RE(BO<sub>3</sub>)<sub>3</sub> (RE = Y, Gd), YBO<sub>3</sub> and ZnO, and at trigonal sites in YAl<sub>3</sub>(BO<sub>3</sub>)<sub>4</sub>

Riti Ghosh,<sup>a</sup> Shankhanil Sarkar,<sup>a</sup> Yatramohan Jana,<sup>a,\*</sup> Danuta Piwowarska,<sup>b</sup> Paweł Gnutek<sup>c</sup> and Czesław Rudowicz<sup>d</sup>

<sup>a</sup> Department of Physics, University of Kalyani, Kalyani -741235, Nadia, W.B., India

<sup>b</sup> Department of Technical Physics, Faculty of Mechanical Engineering and Mechatronics, West Pomeranian University of Technology in Szczecin, 70-311 Szczecin, Poland

<sup>c</sup> Laboratory for Research on Structure and Mechanical Properties of Materials POLITEST, Faculty of Mechanical Engineering and Mechatronics, West Pomeranian University of Technology in Szczecin, 70-311 Szczecin, Poland

<sup>d</sup> Faculty of Chemistry, Adam Mickiewicz University, 61-614 Poznań, Poland

## S1. Crystallographic structure and the axis systems

### S1.1. Li<sub>6</sub>Y(BO<sub>3</sub>)<sub>3</sub>

Yttrium lithium double borate, Li<sub>6</sub>Y(BO<sub>3</sub>)<sub>3</sub>, crystallizes in monoclinic system with space group (SG): *P*2<sub>1</sub>/*c* (no. 14) with four formula units per unit cell (*Z* = 4), and the unit cell parameters are: *a* = 7.157Å, *b* = 16.378Å, and *c* = 6.623Å, and  $\beta = 105.32^\circ$ .<sup>71</sup> The atomic coordinates were collected from 1501933.cif in the website: Crystallography Open Database.<sup>71c</sup> The Y<sup>3+</sup> ions occupy triclinic C<sub>1</sub> site and are surrounded by eight oxygen ions in irregular coordination with different Y–O bond distances. The Y–O band distances in YO<sub>8</sub> polyhedron range from 2.2999Å to 2.5197Å and average Y–O bond is 2.376Å. The distorted YO<sub>8</sub> dodecahedra connect each other by sharing edges to form infinite zigzag chains parallel to the *c*-axis.<sup>38</sup> Eu<sup>3+</sup> ions are doped at Y<sup>3+</sup> sites, sine their ionic radii are almost identical: Y<sup>3+</sup> (1.019Å) and Eu<sup>3+</sup> (1.066Å).<sup>72</sup> Therefore, we may consider the crystallographic data<sup>71</sup> of undoped Li<sub>6</sub>Y(BO<sub>3</sub>)<sub>3</sub> crystal as for the doped crystal. Due to the monoclinic crystal symmetry of Li<sub>6</sub>Y(BO<sub>3</sub>)<sub>3</sub>, the CAS is non-Cartesian and hence, a modified CAS\* must be chosen for CFP modelling in ECM approach. We adopt the CAS\* (*a*\*, *b*, *c*) with Y/Eu at the origin as follows: *X*||*a*\*, *Y*||*b*, and *Z*||*c*, with the *a*\*-axis perpendicular to the *b*-*c* plane. Thus, the *a*-axis lies in the (*a*\**c*) plane making an angle  $\beta$  away from the *c*-axis. The atomic coordinates (*x*, *y*, *z*) expressed in CAS may be converted to the CAS\* coordinates using relations:  $X = x \sin\beta$ ,  $Y = y$  and  $Z = x \cos\beta + z$ .<sup>34</sup>

### S1.2. Li<sub>6</sub>Gd(BO<sub>3</sub>)<sub>3</sub>

Li<sub>6</sub>Gd(BO<sub>3</sub>)<sub>3</sub> host is isostructural to Li<sub>6</sub>Y(BO<sub>3</sub>)<sub>3</sub>.<sup>37–39</sup> The atomic coordinates and structural parameters are given in.<sup>40</sup> The unit cell parameters are: *a* = 7.2277Å, *b* = 16.5075Å, and *c* = 6.6933Å, and  $\beta = 105.3737^\circ$ .<sup>40</sup> Since smaller Y atom is replaced by the larger Gd atom,<sup>72</sup> the unit cell volume is larger for Li<sub>6</sub>Gd(BO<sub>3</sub>)<sub>3</sub> host (*V* = 769.93 Å<sup>3</sup>) than for Li<sub>6</sub>Y(BO<sub>3</sub>)<sub>3</sub> (*V* = 748.74Å<sup>3</sup>). The Gd–O bond

distances in GdO<sub>8</sub> polyhedron range from 2.23 Å to 2.597 Å and average Gd–O bond is 2.437 Å. Thus, the size of the GdO<sub>8</sub> polyhedron is also larger than that of YO<sub>8</sub> polyhedron in Li<sub>6</sub>Y(BO<sub>3</sub>)<sub>3</sub>.

### S1.3. YBO<sub>3</sub>

Yttrium orthoborate, YBO<sub>3</sub>, crystal belongs to monoclinic structure with SG: *C2/c* (no. 15) and *Z* = 12. The unit cell parameters are:  $a = 11.314$  Å,  $b = 6.5404$  Å,  $c = 9.5503$  Å, and  $\beta = 112.902^\circ$ .<sup>41</sup> The Y<sup>3+</sup> ions are coordinated to eight oxygens, but two bridging oxygens are quite distant. Hence, the Y<sup>3+</sup> ions occupy two distinct Wyckoff sites, 4c and 8f, with triclinic site symmetry, *C<sub>i</sub>* and *C<sub>1</sub>*, respectively. The ratio of Y<sup>3+</sup> (*C<sub>1</sub>*) sites to Y<sup>3+</sup> (*C<sub>i</sub>*) sites is 2:1.<sup>41</sup> Eu<sup>3+</sup> ions replace Y<sup>3+</sup> ions in YBO<sub>3</sub>:Eu<sup>3+</sup>.<sup>15</sup> Average Y/Eu–O bond distance is 2.384 Å at the *C<sub>i</sub>* site, while 2.356 Å at the *C<sub>1</sub>* site.<sup>41</sup> The CAS\* ( $a^*$ ,  $b$ ,  $c$ ) were also adopted for CFP modelling of YBO<sub>3</sub>:Eu<sup>3+</sup> as for Li<sub>6</sub>RE(BO<sub>3</sub>)<sub>3</sub>.

### S1.4. ZnO

ZnO crystallizes in wurtzite nanostructure having hexagonal SG: *P6<sub>3</sub>mc* - *C<sub>6v</sub><sup>4</sup>* (no. 186).<sup>17,18</sup> The unit cell parameters are:  $a = b = 3.28$  Å,  $c = 5.17$  Å,  $\gamma = 120^\circ$  and *Z* = 2. Zn<sup>2+</sup> occupies a trigonal geometry with *C<sub>3v</sub>* point symmetry and is coordinated to four oxygens in pure ZnO. There are two sets of Zn–O bonds in Zn–O<sub>4</sub> tetrahedron: one Zn–O(2) bond of length 1.9853 Å and three Zn–O(1) bonds of length 1.9864 Å. The bond angle O(2)–Zn–O(1) is 107.8325°, while O(1)–Zn–O(1) angles are 111.06°. Zn<sup>2+</sup> is replaced by Eu<sup>3+</sup> ions in ZnO:Eu<sup>3+</sup> nanocrystals. The mismatch of ionic radius and charge compensation of host-dopant (Zn<sup>2+</sup> -Eu<sup>3+</sup>) ions induce significant lattice distortion or strain, and thus, lowering of the actual trigonal *C<sub>3v</sub>* symmetry at substitutional sites.<sup>16,17</sup> Since four coordination is too low for RE<sup>3+</sup> ions,<sup>19</sup> there are two distinct sites for Eu<sup>3+</sup> substitutions in ZnO: surface site (denoted as the A-sites) having *C<sub>1</sub>* symmetry and lattice sites (B-sites) having *C<sub>s</sub>* or *C<sub>1</sub>* symmetry. A- and B- sites are coordinated to seven and four oxygen ions, respectively.<sup>16</sup> Since the hexagonal axes do not form any Cartesian axis system, for CFP modelling we adopted a CAS\* with Zn/Eu at the origin, as follows:<sup>34</sup> the *Z* axis lies along the crystal *c*-axis (which is parallel to the *C<sub>3</sub>* axis),<sup>19</sup> the *Y* axis bisects the angle  $\gamma$ , the *X* axis being normal to the *YZ* plane in the right-handed sense, i.e.,  $X = \sqrt{3}(x - y)/2$ ,  $Y = (x + y)/2$ ,  $Z = z$ .

### S1.5. YAl<sub>3</sub>(BO<sub>3</sub>)<sub>4</sub>

Yttrium aluminium borate, YAl<sub>3</sub>(BO<sub>3</sub>)<sub>4</sub>, crystallizes in hexagonal structure having SG: *R32* (no. 155). The unit cell parameters are:  $a = b = 9.295$  Å,  $c = 7.243$  Å,  $\gamma = 120^\circ$  and *Z* = 3.<sup>73</sup> Y<sup>3+</sup> is replaced by Eu<sup>3+</sup> ions and is coordinated to six oxygens. Y/Eu<sup>3+</sup> occupies a trigonal geometry with *D<sub>3</sub>* point symmetry. The Eu<sup>3+</sup> ions are located on the three-fold rotary axis *C<sub>3</sub>* in slightly distorted prisms in which the upper and lower triangles are slightly rotated relative to each other by an angle 2Φ.<sup>74</sup> All six Y/Eu–O3 bond lengths are equal to 2.154 Å, while O3–Y/Eu–O3 angles, i.e., 142.155°, 114.714°,

98.17°, 60.532°, differ substantially from the characteristic octahedral angles of 180° and 90°, giving rise to the trigonal distortion of Y/Eu-O<sub>6</sub> polyhedra in YAl<sub>3</sub>(BO<sub>3</sub>)<sub>4</sub>. The CAS\* for CFP modelling is the same as for the hexagonal ZnO:Eu<sup>3+</sup> crystal.

## S2. Review of experimental energy levels and CF calculations

### S2.1. Li<sub>6</sub>Y(BO<sub>3</sub>)<sub>3</sub>:Eu<sup>3+</sup>

Photoluminescence spectra of Eu<sup>3+</sup> doped yttrium lithium double borates, Li<sub>6</sub>Y(BO<sub>3</sub>)<sub>3</sub>, were recorded at 77 K by Hölsä and Leskelä<sup>38</sup> and also at 300K by Ju *et al.*<sup>39</sup> The experimentally determined 24 energy levels including 3 for <sup>7</sup>F<sub>1</sub>, 5 for <sup>7</sup>F<sub>2</sub>, 6 for <sup>7</sup>F<sub>3</sub>, 8 for <sup>7</sup>F<sub>4</sub> due to <sup>5</sup>D<sub>0</sub> → <sup>7</sup>F<sub>0-4</sub> transitions in the energy range up to 17250 cm<sup>-1</sup> were reported by Hölsä and Leskelä.<sup>38</sup> The observed barycentre of the energy bands was estimated at: 0 (<sup>7</sup>F<sub>0</sub>), 357 cm<sup>-1</sup> (<sup>7</sup>F<sub>1</sub>), 900 cm<sup>-1</sup> (<sup>7</sup>F<sub>2</sub>), 1898 cm<sup>-1</sup> (<sup>7</sup>F<sub>3</sub>), 3011 cm<sup>-1</sup> (<sup>7</sup>F<sub>4</sub>) and 17234 cm<sup>-1</sup> (<sup>5</sup>D<sub>0</sub>).<sup>38</sup> The overall CF splittings of the <sup>7</sup>F<sub>1-4</sub> multiplets are, respectively: 144, 130, 198, 368 (all in cm<sup>-1</sup>). The  $E_i$  were calculated using an approximated CF Hamiltonian as a function of only two CFPs, *e.g.*,  $B_{20}$  and  $B_{22}$ . However, calculated  $E_i$  were not listed therein.<sup>38</sup> The fitted CFPs were grossly inadequate and incompatible with the fact that no point symmetry exists for which CF Hamiltonian can be parametrized by two CFPs only. Furthermore, for the low triclinic symmetry, several possible sets of the *non-standard* CFPs can be obtained in fittings of the observed energy levels for 4f ions.<sup>23,34,38</sup> For example, three sets of  $B_{20}$  and  $B_{22}$  were obtained for Li<sub>6</sub>RE(BO<sub>3</sub>)<sub>3</sub>:Eu<sup>3+</sup> (RE = Y, Gd).<sup>38</sup> Thus, since these CFP sets are physically equivalent but numerically distinct, they cannot be related to any particular axis system.<sup>23,27</sup> Alternatively, no axis system can be assigned to the CFP sets fitted for Li<sub>6</sub>Y(BO<sub>3</sub>)<sub>3</sub>:Eu<sup>3+</sup>.<sup>38</sup> This realization has led to introduction of the notion of a *nominal* axis system,<sup>23</sup> *i.e.*, an undefined Cartesian axis system assigned to a given alternative CFP set. The *nominal* axes cannot be *a priori* related to any well-defined axes in crystal. Orientation of a particular *nominal* axis system, in which a given alternative CFP set is expressed, may be established by comparison with the modelled CFPs calculated using, *e.g.*, ECM<sup>49,50</sup> or SPM<sup>51-53</sup> in a well-defined axis system,<sup>53</sup> *e.g.*, symmetry adapted axis system (SAAS), CAS or CAS\*.<sup>21-27,37</sup>

The photoluminescence spectra of Li<sub>6</sub>Y(BO<sub>3</sub>)<sub>3</sub>:Eu<sup>3+</sup> at room temperature exhibited some sharp peaks in the visible and UV region.<sup>39</sup> The CF splitting components were not observed in<sup>39</sup> due to poor resolution of the spectrophotometer used. The sharp peaks were ascribed to the intra-configurational 4f - 4f transitions (absorption) of Eu<sup>3+</sup> in the host Li<sub>6</sub>Y(BO<sub>3</sub>)<sub>3</sub> crystal: <sup>7</sup>F<sub>0</sub> → <sup>5</sup>F<sub>4</sub>, <sup>5</sup>H<sub>6</sub>, <sup>5</sup>H<sub>3</sub>, <sup>5</sup>D<sub>4</sub>, (<sup>5</sup>G<sub>7</sub> and <sup>5</sup>L<sub>7</sub> manifold), <sup>5</sup>L<sub>6</sub>, <sup>5</sup>D<sub>3</sub>, <sup>5</sup>D<sub>2</sub>, <sup>5</sup>D<sub>1</sub> at energies: 33557, 31446, 30675, 27701, 26455, 25445, 23981, 21552, 19048 (all in cm<sup>-1</sup>), respectively. In addition, the sample showed groups of sharp peaks in the emission spectra due to <sup>5</sup>D<sub>0</sub> → <sup>7</sup>F<sub>0-4</sub> transitions.<sup>39</sup> The  $E_i$  from the emission spectra were assigned as follows (all in cm<sup>-1</sup>): 0 (<sup>7</sup>F<sub>0</sub>), 405 (<sup>7</sup>F<sub>1</sub>), 925 (<sup>7</sup>F<sub>2</sub>), 1803 (<sup>7</sup>F<sub>3</sub>), 3067 (<sup>7</sup>F<sub>4</sub>), 17212 (<sup>5</sup>D<sub>0</sub>), 19048 (<sup>5</sup>D<sub>1</sub>),

21552 ( $^5D_2$ ), 23981 ( $^5D_3$ ), 27701 ( $^5D_4$ ), 25445 ( $^5L_6$ ), 26455 ( $^5L_7$ ), 30675 ( $^5H_3$ ), 31446 ( $^5H_6$ ) and 33557 ( $^5F_4$ ). However, calculations of  $E_i$  were not performed in <sup>39</sup>.

## S2.2. $\text{Li}_6\text{Gd}(\text{BO}_3)_3:\text{Eu}^{3+}$

Photoluminescence spectra of  $\text{Eu}^{3+}$  doped in  $\text{Li}_6\text{Gd}(\text{BO}_3)_3$  were recorded at 77 K by Hölsä and Leskelä.<sup>38</sup> The observed barycentre of the energy bands is found at (all in  $\text{cm}^{-1}$ ): 0 ( $^7F_0$ ), 356 ( $^7F_1$ ), 900 ( $^7F_2$ ), 1898 ( $^7F_3$ ), 2999 ( $^7F_4$ ) and 17238 ( $^5D_0$ ).<sup>38</sup> The comparison of the observed barycentre of the  $^{2S+1}L_J$  multiplets of  $\text{Eu}^{3+}$  ions in different hosts, *i.e.*,  $\text{Li}_6\text{Y}(\text{BO}_3)_3$  and  $\text{Li}_6\text{Gd}(\text{BO}_3)_3$ , reveals only slight variations which may be due to the nephelauxetic effect.<sup>19,38</sup> The  $E_i$  were also calculated<sup>38</sup> using four different sets of only two CFPs, *i.e.*,  $B_{20}$  and  $B_{22}$ , though calculated levels were not provided by Hölsä and Leskelä.<sup>38</sup> The CF splittings of  $^7F_{1-4}$  multiplets are larger for the  $\text{Li}_6\text{Gd}(\text{BO}_3)_3$  host (162, 122, 207, 372  $\text{cm}^{-1}$ ) than for  $\text{Li}_6\text{Y}(\text{BO}_3)_3$  host<sup>38</sup> and hence the matched CFPs are somewhat larger for  $\text{Li}_6\text{Gd}(\text{BO}_3)_3$  host than for  $\text{Li}_6\text{Y}(\text{BO}_3)_3$ .<sup>38</sup>

## S2.3. $\text{YBO}_3:\text{Eu}^{3+}$

Photoluminescence spectra of  $\text{YBO}_3:\text{Eu}^{3+}$  (0.5 atom%) crystal was measured at 10 K.<sup>15</sup> The samples did not exhibit any characteristics of phase transitions on cooling to 10 K, so that the  $\text{Eu}^{3+}$  site symmetry can be taken as in pure crystal.<sup>15</sup> The emission and absorption spectra exhibited characteristic features of two distinct  $\text{Eu}^{3+}$  sites of triclinic symmetry without inversion ( $C_1$ ) and with inversion ( $C_i$ ). Total 31 levels were experimentally assigned for  $\text{Eu}^{3+}$  ions in the  $C_1$  sites, including 3 for  $^7F_1$ , 5 for  $^7F_2$ , 6 for  $^7F_3$ , 7 for  $^7F_4$  due to  $^5D_0 \rightarrow ^7F_{0-4}$  emissions in the energy range below 17200  $\text{cm}^{-1}$ , as well as 3 for  $^5D_1$  and 5 for  $^5D_2$  level due to  $^7F_0 \rightarrow ^5D_{1,2}$  absorption within the energy range of 17200 – 21470  $\text{cm}^{-1}$ , as consistent with the selection rules for the  $C_1$  site. On the other hand, only 7 energy levels, including 3 for  $^7F_1$  and 3 for  $^5D_1$  were detected in the emission and absorption spectra for  $\text{Eu}^{3+}$  ions at the  $C_i$  symmetry.<sup>15</sup> As expected, the transition  $^5D_0 \rightarrow ^7F_0$  was not observed as expected for  $\text{Eu}^{3+}$  ion at the  $C_i$  site.<sup>15</sup> Since only few  $E_i$  for  $C_i$  symmetry were detected in luminescence spectra, the energy level calculations<sup>15</sup> was mostly limited to the levels of  $C_1$  site. Instead of taking the actual  $C_1$  symmetry at  $\text{Eu}^{3+}$  ion site, Jia *et al.*<sup>15</sup> employed ascend/descend symmetry (ADS) method<sup>19,22,27,36</sup> in the chain: ‘triclinic ( $C_1$ ,  $C_i$ )  $\rightarrow$  orthorhombic ( $C_{2v}$ )  $\rightarrow$  cubic ( $O_h$ )’ to minimize the number (total 27) of CFPs required for the energy level calculations. Thus, in the spirit of ADS, only nine CFPs, which are all real, were taken in the Hamiltonian: cubic CFPs ( $B_4^C$ ,  $B_6^C$ ), orthorhombic CFPs ( $B_{20}$ ,  $B_{22}$ ,  $B_{42}$ ,  $B_{44}$ ,  $B_{62}$ ,  $B_{64}$  and  $B_{66}$ ).<sup>15</sup> All imaginary CFPs (in Wybourne notation)<sup>19</sup> were set to zero in this approximation.<sup>15</sup> Further, only six non-zero values of CFPs, with large standard deviation of the parameters, were reported, and three CFPs, *i.e.*,  $B_{62}$ ,  $B_{64}$  and  $B_{66}$ , were constrained to zero. From the so-obtained CFP values, it is evident that these approximated symmetry cases correspond to different orientation of the axis system w.r.t. the CAS or the CAS\* adopted above for  $\text{Eu}^{3+}$  at triclinic site. Therefore, it is essential to define precisely the axis system in which

particular higher symmetry approximation is achieved in order to enable CFPs modelling as well as to validate the applicability of the ADS method for analysis of the observed  $E_i$ . Furthermore, if the ADS method is applied, the assignment of a well-defined axis system to a given higher symmetry approximation is necessary to enable comparison of CFPs resulting in the actual triclinic symmetry.<sup>27</sup> The axis system was not explicitly defined by Jia *et al.*<sup>15</sup> for the actual triclinic symmetry case or for the assumed higher symmetry cases for  $\text{YBO}_3:\text{Eu}^{3+}$ .

#### S2.4. $\text{ZnO}:\text{Eu}^{3+}$

Optical spectra of  $\text{Eu}^{3+}$  doped ZnO nanocrystals were recorded at 10 K.<sup>16</sup> The surface site (A) exhibits inhomogeneous broadening of excitation and emission spectra of  $\text{Eu}^{3+}$  due to a very distorted local environment. The lattice site (B) shows very sharp and intense spectra due to the bulk crystalline surrounding of  $\text{Eu}^{3+}$  ions. Very sharp f-f transitions,  ${}^5\text{D}_0 \rightarrow {}^7\text{F}_J$  ( $J = 0 - 4$ ) and weak emission lines corresponding to  ${}^5\text{D}_1 \rightarrow {}^7\text{F}_J$  ( $J = 1 - 4$ ) were detected at 10 K. Three lines for  ${}^5\text{D}_0 \rightarrow {}^7\text{F}_1$  transitions and five lines for  ${}^5\text{D}_0 \rightarrow {}^7\text{F}_2$  transitions of  $\text{Eu}^{3+}$  were observed, suggesting descend of symmetry from actual trigonal  $C_{3v}$  to triclinic  $C_1$  symmetry for the A-site and to  $C_s$  or  $C_1$  (monoclinic/triclinic) symmetry for the B-site. A total number of 12 energy levels for A-site and 25 energy levels for B-site were identified.<sup>16</sup> The width of the  ${}^7\text{F}_1$  level for  $\text{Eu}^{3+}$  ions at the A-sites ( $= 147 \text{ cm}^{-1}$ ) is larger than that at the B-sites ( $= 134 \text{ cm}^{-1}$ ), implying relatively stronger CF strength for the A-site due to higher oxygen coordination. However, no CF calculations using the observed spectra were performed in Ref. 16.

#### S2.5. $\text{YAl}_3(\text{BO}_3)_4$

Fluorescence, absorption and magnetic circular dichroism (MCD) spectra of  $\text{YAl}_3(\text{BO}_3)_4:\text{Eu}^{3+}$  were recorded at 77 K and 4.2 K by Görller-Warland *et al.*<sup>11</sup> Later, luminescence emission and absorption spectra of  $\text{YAl}_3(\text{BO}_3)_4:\text{Eu}^{3+}$  were also recorded at room temperature by Ben Amar *et al.*<sup>12</sup> The emission and absorption spectra arise due to transitions between the states arising from different  ${}^{2S+1}L_J$  multiplets of  $\text{Eu}^{3+}$  ions in the trigonal  $D_3$  site symmetry.<sup>12</sup> The absorption spectrum originates from the  ${}^7\text{F}_{0,1,2} \rightarrow {}^5\text{D}_{0-3}$  transitions within the energy range in the  $15,000\text{--}30,000 \text{ cm}^{-1}$ , whereas the emission spectrum of  $\text{YAl}_3(\text{BO}_3)_4:\text{Eu}^{3+}$  corresponds to the  ${}^5\text{D}_0 \rightarrow {}^7\text{F}_J$  transitions in the range  $13000 - 20000 \text{ cm}^{-1}$ . The energy level scheme associated with the  ${}^{2S+1}L_J$  multiplets of  $\text{Eu}^{3+}$  ion within the energy range was determined as:<sup>11</sup>  $0 - 5353 \text{ cm}^{-1}$  ( ${}^7\text{F}_{0-6}$ ),  $17215 \text{ cm}^{-1}$  ( ${}^5\text{D}_3$ ),  $18965 - 24620 \text{ cm}^{-1}$  ( ${}^5\text{D}_{0-3}$ ) and  $24877 - 25341 \text{ cm}^{-1}$  ( ${}^5\text{L}_6$ ). The CFP modelling and calculations of  $E_i$  were performed using two different approaches:<sup>11</sup> lattice sum calculations method, and ADS method applying to symmetry lowering from approximated hexagonal  $D_{3h} \rightarrow$  actual trigonal  $D_3$  site symmetry,<sup>11</sup> but the axis system used for the CFPs modelling was not defined therein.<sup>11</sup> Using the transition energies, Ben Amor *et al.*<sup>12</sup> also listed the observed  $E_i$  (all in  $\text{cm}^{-1}$ ):  $0 - 4450$  ( ${}^7\text{F}_{0-5}$ ),  $17250 - 24400$  ( ${}^5\text{D}_{0-3}$ ),  $25250 - 26050$

( ${}^5L_{6,7}$ ), 26200– 26600 ( ${}^5G_{2,4}$ ) and at 27642 ( ${}^5D_4$ ). The  $E_i$  were calculated using a model Hamiltonian consisting of the free-ion terms only, disregarding the CF terms for the  $D_3$  symmetry of  $Eu^{3+}$  site.<sup>12</sup>

**Table S1** Survey of free-ion parameters (FIPs) (in  $cm^{-1}$ ) for  $Eu^{3+}$  ions in respective systems (in  $cm^{-1}$ ): (b) mean value of FIPs of  $Eu^{3+}$  ions in different hosts, taken from Table 5;<sup>19</sup> (c) and (d) for two  $Li_6Y(BO_3)_3:Eu^{3+}$  samples studied in <sup>38</sup> and <sup>39</sup>, respectively; (e) for  $Li_6Gd(BO_3)_3:Eu^{3+}$ ; <sup>38</sup> (f)  $C_1$  symmetry site and (g)  $C_i$  symmetry site for  $YBO_3:Eu^{3+}$ ; <sup>15</sup> (h) A-site and (i) B-site for  $ZnO:Eu^{3+}$ ; <sup>16</sup> (j) for  $YAl_3(BO_3)_4:Eu^{3+}$ .<sup>11</sup> In columns (c) – (j), only the varied FIPs are listed, while other FIPs are kept constant at the values as in (b). For definitions of FIPs, see, text

| FIPs         |       | $Li_6Y(BO_3)_3$ |       | $Li_6Gd(BO_3)_3$ | $YBO_3$ |       | $ZnO$ |       | $YAl_3(BO_3)_4$ |
|--------------|-------|-----------------|-------|------------------|---------|-------|-------|-------|-----------------|
| (a)          | (b)   | (c)             | (d)   | (e)              | (f)     | (g)   | (h)   | (i)   | (j)             |
| $E_{AVE}$    | 63736 |                 |       |                  |         |       |       |       |                 |
| $F^2$        | 82786 | 82664           | 82506 | 82478            | 82481   | 82658 | 82694 | 82718 | 82744           |
| $F^4$        | 59401 | 59125           | 59248 | 59462            | 59202   | 58939 | 58998 | 59123 | 59371           |
| $F^6$        | 42644 | 42680           | 42702 | 42809            | 42464   | 42551 | 42432 | 42487 | 42612           |
| $\alpha$     | 19.80 |                 |       |                  |         |       |       |       |                 |
| $\beta$      | −617  |                 |       |                  |         |       |       |       |                 |
| $\gamma$     | 1460  |                 |       |                  |         |       |       |       |                 |
| $T^2$        | 370   |                 |       |                  |         |       |       |       |                 |
| $T^3$        | 40    |                 |       |                  |         |       |       |       |                 |
| $T^4$        | 40    |                 |       |                  |         |       |       |       |                 |
| $T^6$        | −330  |                 |       |                  |         |       |       |       |                 |
| $T^7$        | 380   |                 |       |                  |         |       |       |       |                 |
| $T^8$        | 370   |                 |       |                  |         |       |       |       |                 |
| $\zeta_{4f}$ | 1332  | 1323            | 1325  | 1324             | 1326    | 1331  | 1327  | 1333  | 1330            |
| $M^0$        | 2.38  |                 |       |                  |         |       |       |       |                 |
| $M^2$        | 1.33  |                 |       |                  |         |       |       |       |                 |
| $M^4$        | 0.90  |                 |       |                  |         |       |       |       |                 |
| $P^2$        | 303   |                 |       |                  |         |       |       |       |                 |
| $P^4$        | 227   |                 |       |                  |         |       |       |       |                 |
| $P^6$        | 152   |                 |       |                  |         |       |       |       |                 |

**Table S2**  $Li_6Y(BO_3)_3:Eu^{3+}$ : (a) Allowed crystal-field parameters (CFPs) for the triclinic  $C_1$  point symmetry at  $Eu^{3+}$  site; the calculated CFPs values ( $cm^{-1}$ ) employing: (b) the ECM method and (c) SPM method along with the rotational invariants,  $S_k$ ; triclinic ECM/CFPs and SPM/CFPs standardized using the package: 3DD - (b') and (c'); (d)  ${}^{2S+1}L_J$  multiplets of  $Eu^{3+}$  ion; (e) experimental<sup>38</sup> and (f) calculated energy ( $cm^{-1}$ ) levels; (g) the largest and second largest  $M_J$  values of the  $|{}^{2S+1}L_J, M_J\rangle$  levels and (h) varied values of ECM (SPM)/CFPs are tabulated

| CFPs       |      |      |      |      | Multiplet | $E_{\text{exp}}$ | $E_i^{\text{cal}}$ | $M_J$ | Varied ECM<br>(SPM)/CFPs |
|------------|------|------|------|------|-----------|------------------|--------------------|-------|--------------------------|
|            | ECM  | SPM  | 3DD* |      |           |                  |                    |       |                          |
| (a)        | (b)  | (c)  | (b') | (c') | (d)       | (e)              | (f)                | (g)   | (h)                      |
| $B_{20}$   | 66   | 113  | -397 | 409  | ${}^7F_0$ | 0                | 0                  | 0     |                          |
| $B_{21}^r$ | 214  | -164 | 0    | 0    | ${}^7F_1$ | 269              | 267                | -1,1  | $B_{21}^r = 343 (-312)$  |
| $B_{21}^i$ | -183 | 178  | 0    | 0    |           | 386              | 383                | 1,0   |                          |
| $B_{22}^r$ | 111  | 155  | -138 | 119  |           | 413              | 416                | 0,1   | $B_{21}^r = 137 (-98)$   |
| $B_{22}^i$ | 64   | -93  | 0    | 0    | ${}^7F_2$ | 837              | 837                | 0,2   | $B_{44}^r = 330 (294)$   |
| $B_{40}$   | 1128 | 1142 | -137 | -749 |           | 856              | 862                | -2,2  |                          |
| $B_{41}^r$ | 563  | 567  | -223 | 132  |           | 908              | 910                | 2,-2  |                          |
| $B_{41}^i$ | 178  | 164  | -171 | -352 |           | 926              | 925                | -1,1  | $B_{20} = 120 (181)$     |
| $B_{42}^r$ | -244 | -232 | -429 | 516  |           | 967              | 970                | 1,-1  | $B_{40} = 1308 (1278)$   |
| $B_{42}^i$ | 67   | 71   | 69   | -274 | ${}^7F_3$ | 1800             | 1808               | -2,2  | $B_{66}^r = 354 (368)$   |
| $B_{43}^r$ | 312  | 278  | -705 | 70   |           | 1830             | 1827               | 2,-2  |                          |
| $B_{43}^i$ | 24   | 31   | -649 | 525  |           | 1849             | 1848               | -3,3  |                          |
| $B_{44}^r$ | 251  | 270  | 47   | 153  |           | -                | 1871               | 3,-3  |                          |
| $B_{44}^i$ | -52  | -48  | -122 | -381 |           | 1934             | 1928               | 1,-1  | $B_{66}^r = 202 (204)$   |
| $B_{60}$   | 140  | 142  | 171  | 13   | 1977      | 1972             | 0,-1               |       |                          |
| $B_{61}^r$ | 157  | 155  | -151 | -44  | 1998      | 1993             | 0,-1               |       |                          |
| $B_{61}^i$ | 13   | 15   | -87  | 132  | ${}^7F_4$ | 2815             | 2815               | -3,3  | $B_{62}^r = 308 (314)$   |
| $B_{62}^r$ | 220  | 243  | 114  | -173 |           | 2884             | 2877               | -3,3  | $B_{66}^r = 385 (391)$   |
| $B_{62}^i$ | -2   | -3   | 92   | 144  |           | -                | 2895               | 2,-2  |                          |
| $B_{63}^r$ | -55  | -59  | 208  | 173  |           | 2912             | 2917               | -2,2  |                          |
| $B_{63}^i$ | 17   | 20   | 107  | 136  |           | 2994             | 3002               | 0,-2  |                          |
| $B_{64}^r$ | 7    | 3    | -30  | 105  |           | 3042             | 3048               | -1,4  |                          |
| $B_{64}^i$ | -78  | -20  | -154 | -86  |           | 3086             | 3092               | 1,0   |                          |
| $B_{65}^r$ | -134 | -134 | 27   | 199  |           | 3168             | 3162               | -4,0  |                          |
| $B_{65}^i$ | 10   | -54  | 108  | 92   |           | 3183             | 3180               | 0,-4  |                          |

|            |     |     |     |     |           |       |       |   |  |
|------------|-----|-----|-----|-----|-----------|-------|-------|---|--|
| $B_{66}^r$ | 276 | 265 | -23 | -71 | ${}^5D_0$ | 17234 | 17237 | 0 |  |
| $B_{66}^i$ | -20 | -52 | 169 | -36 |           |       |       |   |  |
| $S_2$      | 198 | 197 | 198 | 198 |           |       |       |   |  |
| $S_4$      | 519 | 519 | 519 | 519 |           |       |       |   |  |
| $S_6$      | 170 | 172 | 170 | 172 |           |       |       |   |  |

\* The rhombicity ratio:  $\kappa = B_{22}^r/B_{20}$  is: 0.35 (b'), 0.29 (c'). The Euler angles are:  $\alpha = 59.74$ ,  $\beta = 54.89$ ,  $\gamma = 62.41$  (b');  $\alpha = 27.93$ ,  $\beta = 46.60$ ,  $\gamma = 145.67$  (c') (all in degree).

**Table S3**  $\text{Li}_6\text{Y}(\text{BO}_3)_3:\text{Eu}^{3+}$ : (a) Allowed crystal-field parameters (CFPs) for the triclinic  $C_1$  point symmetry at  $\text{Eu}^{3+}$  site; the calculated CFPs values ( $\text{cm}^{-1}$ ) employing: (b) the ECM method and (c) the SPM method along with the rotational invariants,  $S_k$ ; triclinic ECM/CFPs and SPM/CFPs standardized using the package: 3DD - (b') and (c'); (d)  ${}^{25+1}L_J$  multiplets of  $\text{Eu}^{3+}$  ion; (e) experimental<sup>39</sup> and (f) calculated energy ( $\text{cm}^{-1}$ ) levels; (g) the calculated barycenter are tabulated

| CFPs       |      |      |      |      | Multiplet | $E_{\text{exp}}$ | $E_i^{\text{cal}}$                                   | $E^{\text{avg}}$ |
|------------|------|------|------|------|-----------|------------------|------------------------------------------------------|------------------|
|            | ECM  | SPM  | 3DD* |      |           |                  |                                                      |                  |
| (a)        | (b)  | (c)  | (b') | (c') | (d)       | (e)              | (f)                                                  | (g)              |
| $B_{20}$   | 71   | 120  | -419 | 431  | ${}^7F_0$ | 0                | 0                                                    | 0                |
| $B_{21}^r$ | 223  | -174 | 0    | 0    | ${}^7F_1$ | 405              | 318, 410, 478                                        | 402              |
| $B_{21}^i$ | -192 | 188  | 0    | 0    | ${}^7F_2$ | 925              | 804, 854, 862, 1052, 1086                            | 931              |
| $B_{22}^r$ | 120  | 162  | -143 | 124  | ${}^7F_3$ | 1803             | 1749, 1757, 1773, 1781, 1837, 1853, 1856             | 1801             |
| $B_{22}^i$ | 70   | -97  | 0    | 0    |           |                  |                                                      |                  |
| $B_{40}$   | 1291 | 1302 | -155 | -858 | ${}^7F_4$ | 3067             | 2798, 2936, 2968, 3048, 3103, 3147, 3163, 3188, 3208 | 3062             |
| $B_{41}^r$ | 644  | 647  | -247 | 138  |           |                  |                                                      |                  |
| $B_{41}^i$ | 203  | 187  | -201 | -399 |           |                  |                                                      |                  |
| $B_{42}^r$ | -275 | -264 | -470 | 586  |           |                  |                                                      |                  |
| $B_{42}^i$ | 76   | 81   | 87   | -324 | ${}^5D_0$ | 17211            | 17210                                                | 17210            |
| $B_{43}^r$ | 347  | 317  | -827 | 90   | ${}^5D_1$ | 19048            | 19018, 19044, 19102                                  | 19054            |
| $B_{43}^i$ | 31   | 35   | -726 | 597  | ${}^5D_2$ | 21552            | 21512, 21528, 21544, 21568, 21584                    | 21547            |



|            |      |      |      |      |           |       |                                                                                                       |       |
|------------|------|------|------|------|-----------|-------|-------------------------------------------------------------------------------------------------------|-------|
| $B_{44}^r$ | 288  | 308  | 40   | 168  |           |       |                                                                                                       |       |
| $B_{44}^i$ | -61  | -54  | -158 | -435 | ${}^5D_3$ | 23981 | 23956, 23959, 23969,<br>23978, 23983, 24003,<br>24007                                                 | 23980 |
| $B_{60}$   | 174  | 173  | 230  | 18   |           |       |                                                                                                       |       |
| $B_{61}^r$ | 194  | 188  | -184 | -49  |           |       |                                                                                                       |       |
| $B_{61}^i$ | 16   | 18   | -106 | 159  | ${}^5L_6$ | 25445 | 25200, 25204, 25240,<br>25267, 25287, 25312,<br>25460, 25530, 25604,<br>25659, 25668, 25671,<br>25674 | 25444 |
| $B_{62}^r$ | 276  | 295  | 130  | -210 |           |       |                                                                                                       |       |
| $B_{62}^i$ | -1   | -3   | 103  | 176  |           |       |                                                                                                       |       |
| $B_{63}^r$ | -68  | -72  | 259  | 211  |           |       |                                                                                                       |       |
| $B_{63}^i$ | 20   | 24   | 139  | 166  |           |       |                                                                                                       |       |
| $B_{64}^r$ | 6    | 3    | -37  | 127  |           |       |                                                                                                       |       |
| $B_{64}^i$ | -91  | -25  | -183 | -107 |           |       |                                                                                                       |       |
| $B_{65}^r$ | -164 | -164 | 37   | 245  |           |       |                                                                                                       |       |
| $B_{65}^i$ | 12   | -65  | 126  | 106  |           |       |                                                                                                       |       |
| $B_{66}^r$ | 337  | 322  | -19  | -87  |           |       |                                                                                                       |       |
| $B_{66}^i$ | -23  | -63  | 214  | -40  |           |       |                                                                                                       |       |
| $S_2$      | 208  | 208  | 208  | 208  |           |       |                                                                                                       |       |
| $S_4$      | 592  | 592  | 592  | 592  |           |       |                                                                                                       |       |
| $S_6$      | 208  | 209  | 209  | 208  |           |       |                                                                                                       |       |

\* The rhombicity ratio:  $\kappa = B_{22}^r/B_{20}$  is: 0.34 (b'), 0.29 (c'). The Euler angles are:  $\alpha = 60.21$ ,  $\beta = 55.28$ ,  $\gamma = 61.75$  (b');  $\alpha = 28.02$ ,  $\beta = 46.42$ ,  $\gamma = 145.33$  (c') (all in degree).

**Table S4** The spherical polar coordinates ( $R_h$ ,  $\theta_h$ ,  $\phi_h$ ) for the  $O^{2-}$  ligands around the metal center in the distorted  $YO_8$  polyhedron in  $Li_6Y(BO_3)_3$ <sup>71</sup> and  $Li_6Gd(BO_3)_3$ <sup>40</sup> host crystal obtained in the CAS\* ( $a^*/X$ ,  $b//Y$ ,  $c//Z$ ). For explanations, see, text

| O <sup>2-</sup><br>ion | Li <sub>6</sub> Y(BO <sub>3</sub> ) <sub>3</sub> |                |              | Li <sub>6</sub> Gd(BO <sub>3</sub> ) <sub>3</sub> |                |              |
|------------------------|--------------------------------------------------|----------------|--------------|---------------------------------------------------|----------------|--------------|
|                        | $R_h$ (Å)                                        | $\theta_h$ (°) | $\phi_h$ (°) | $R_h$ (Å)                                         | $\theta_h$ (°) | $\phi_h$ (°) |
| O2                     | 2.359                                            | 86.447         | -3.066       | 2.425                                             | 84.087         | -8.144       |
| O3                     | 2.420                                            | 87.061         | 55.515       | 2.526                                             | 85.143         | 55.380       |
| O5                     | 2.356                                            | 90.291         | -174.860     | 2.516                                             | 93.413         | -174.533     |
| O6                     | 2.384                                            | 99.048         | 126.462      | 2.532                                             | 100.080        | 130.118      |
| O8                     | 2.354                                            | 63.229         | -77.252      | 2.274                                             | 59.052         | -76.086      |
| O8'                    | 2.300                                            | 168.151        | 10.814       | 2.231                                             | 167.373        | -15.910      |
| O9                     | 2.317                                            | 14.008         | 151.362      | 2.395                                             | 18.016         | 161.687      |
| O9'                    | 2.520                                            | 114.973        | -102.443     | 2.597                                             | 114.310        | -107.286     |

**Table S5**  $Li_6Gd(BO_3)_3:Eu^{3+}$ : (a) Allowed crystal-field parameters (CFPs) for the triclinic  $C_1$  point symmetry at  $Eu^{3+}$  site; the calculated CFPs values ( $cm^{-1}$ ) employing: (b) the ECM method and (c) the SPM method along with the rotational invariants,  $S_k$ ; triclinic ECM/CFPs and SPM/CFPs standardized using the package 3DD- (b') and (c'); (d)  $^{2S+1}L_J$  multiplets of  $Eu^{3+}$  ion; (e) experimental<sup>38</sup> and (f) calculated energy ( $cm^{-1}$ ) levels; (g) the largest and second largest  $M_J$  values of the  $|^{2S+1}L_J, M_J\rangle$  levels; and (h) varied values of ECM (SPM)/CFPs are tabulated

|            | CFPs |      |       |       | Multiplet | $E_{exp}$ | $E_i^{cal}$ | $M_J$ | Varied ECM (SPM)/<br>CFPs                      |
|------------|------|------|-------|-------|-----------|-----------|-------------|-------|------------------------------------------------|
|            | ECM  | SPM  | 3DD*  |       |           |           |             |       |                                                |
| (a)        | (b)  | (c)  | (b')  | (c')  | (d)       | (e)       | (f)         | (g)   | (h)                                            |
| $B_{20}$   | 740  | 755  | -1132 | -1060 | $^7F_0$   | 0         | 0           | 0     |                                                |
| $B_{21}^r$ | 148  | 242  | 0     | 0     | $^7F_1$   | 258       | 254         | -1, 1 | $B_{20} = 508$ (506)                           |
| $B_{21}^i$ | -336 | -448 | 0     | 0     |           | 391       | 395         | 1, -1 |                                                |
| $B_{22}^r$ | 382  | 65   | -230  | -365  |           | 420       | 425         | 0, -2 | $B_{20} = 468$ (452),<br>$B_{22}^r = 223$ (38) |
| $B_{22}^i$ | 373  | 383  | 0     | 0     | $^7F_2$   |           |             |       |                                                |
| $B_{40}$   | 729  | 845  | 382   | 356   |           | 837       | 840         | 2, -1 | $B_{20} = 967$ (972),                          |
| $B_{41}^r$ | 686  | 649  | -221  | -51   |           | 860       | 865         | -2, 2 | $B_{40} = 948$ (980)                           |
| $B_{41}^i$ | 241  | 219  | -68   | -214  |           | 911       | 915         | 0, 1  |                                                |

|            |      |      |      |      |           |           |       |       |                        |
|------------|------|------|------|------|-----------|-----------|-------|-------|------------------------|
| $B_{42}^r$ | -244 | -187 | 94   | 329  |           | 933       | 937   | -1,-2 | $B_{20} = 998 (1012),$ |
| $B_{42}^i$ | 120  | 128  | -181 | -28  |           | 959       | 964   | 1,-1  | $B_{40} = 965 (988)$   |
| $B_{43}^r$ | 329  | 281  | -558 | -687 | ${}^7F_3$ | 1793      | 1794  | 3,-3  | $B_{60} = 272,$        |
| $B_{43}^i$ | 84   | 96   | -418 | -260 |           | 1829      | 1831  | -3, 3 | $B_{61}^r = 238 (228)$ |
| $B_{44}^r$ | 41   | 167  | 396  | 6    |           | 1848      | 1851  | 2, 1  |                        |
| $B_{44}^i$ | 100  | 52   | -430 | -485 |           | -         | 1874  | -2, 1 |                        |
| $B_{60}$   | 167  | 175  | 173  | -22  |           | 1942      | 1942  | 1,-2  |                        |
| $B_{61}^r$ | 161  | 169  | -93  | 238  |           | 1978      | 1975  | -1, 0 |                        |
| $B_{61}^i$ | 79   | 100  | 268  | 89   |           | 2000      | 1997  | 0,-1  |                        |
| $B_{62}^r$ | 230  | 258  | -139 | 104  |           | 2811      | 2811  | 3,-3  | $B_{66}^r = 337 (-19)$ |
| $B_{62}^i$ | 28   | 36   | 154  | 29   | 2880      | 2880      | 2,-3  |       |                        |
| $B_{63}^r$ | -11  | -6   | 127  | 126  | 2900      | 2888      | -3, 3 |       |                        |
| $B_{63}^i$ | 54   | 59   | 25   | -4   | 2917      | 2916      | 0,-1  |       |                        |
| $B_{64}^r$ | 50   | 34   | 38   | -31  | ${}^7F_4$ | 2997      | 2997  | 2,-3  |                        |
| $B_{64}^i$ | 149  | -75  | 95   | 161  |           | 3049      | 3047  | 0,-2  |                        |
| $B_{65}^r$ | -141 | -153 | 19   | 62   |           | 3088      | 3086  | 1,-1  |                        |
| $B_{65}^i$ | -28  | -89  | -4   | 108  |           | 3164      | 3162  | 4, 1  |                        |
| $B_{66}^r$ | 204  | -28  | -10  | 195  |           | 3183      | 3181  | -4,-3 |                        |
| $B_{66}^i$ | 18   | -165 | 157  | 136  |           | ${}^5D_0$ | 17238 | 17239 | 0                      |
| $S_2$      | 527  | 527  | 527  | 527  |           |           |       |       |                        |
| $S_4$      | 470  | 471  | 470  | 471  |           |           |       |       |                        |
| $S_6$      | 171  | 171  | 171  | 172  |           |           |       |       |                        |

\* The rhombicity ratio:  $\kappa = B_{22}^r/B_{20}$  are: 0.20 (b'), 0.344 (c'). The Euler angles are:  $\alpha = 67.72$ ,  $\beta = -103.50$ ,  $\gamma = 91.22$  (b');  $\alpha = 51.95$ ,  $\beta = -108.71$ ,  $\gamma = 82.84$  (c') (all in degree).

**Table S6**  $\text{YBO}_3:\text{Eu}^{3+}$ : (a) Allowed crystal-field parameters (CFPs) for the triclinic  $C_1$  point symmetry at  $\text{Eu}^{3+}$  site; the calculated CFPs values ( $\text{cm}^{-1}$ ) employing: (b) the ECM method and (c) the SPM method along with the rotational invariants,  $S_k$ ; triclinic ECM/CFPs and SPM/CFPs standardized using the package 3DD - (b') and (c'); (d)  ${}^{2S+1}L_J$  multiplets of  $\text{Eu}^{3+}$  ion; (e) experimental<sup>15</sup> and (f) calculated

energy (cm<sup>-1</sup>) levels; (g) the largest and second largest  $M_J$  values of the  $|^{2S+1}L_J, M_J\rangle$  levels; and (h) varied values of ECM (SPM)/CFPs are tabulated

| CFPs       |      |      |      |      | Multiplet | $E_{exp}$ | $E_i^{cal}$ | $M_J$  | Varied ECM (SPM)/<br>CFPs                                                    |
|------------|------|------|------|------|-----------|-----------|-------------|--------|------------------------------------------------------------------------------|
|            | ECM  | SPM  | 3DD* |      |           |           |             |        |                                                                              |
| (a)        | (b)  | (c)  | (b') | (c') | (d)       | (e)       | (f)         | (g)    | (h)                                                                          |
| $B_{20}$   | 403  | 478  | 722  | -699 | $^7F_0$   | 0         | 0           | 0      | 0                                                                            |
| $B_{21}^r$ | -214 | -109 | 0    | 0    | $^7F_1$   | 325       | 324         | -1, 1  | $B_{20} = 318 (324),$<br>$B_{22}^i = -64 (-92)$                              |
| $B_{21}^i$ | -142 | -136 | 0    | 0    |           | 352       | 356         | 1, 0   |                                                                              |
| $B_{22}^r$ | 334  | 325  | 78   | -153 | $^7F_1$   | 357       | 363         | 0, 1   | $B_{20} = 318 (320),$<br>$B_{21}^r = -188 (-152),$<br>$B_{22}^i = -64 (-68)$ |
| $B_{22}^i$ | -89  | -131 | 0    | 0    |           |           |             |        |                                                                              |
| $B_{40}$   | 300  | 344  | -39  | -21  | $^7F_2$   | 803       | 805         | -2, 2  | $B_{43}^i = 974 (942)$                                                       |
| $B_{41}^r$ | -127 | -251 | 481  | 224  |           |           |             |        |                                                                              |
| $B_{41}^i$ | 311  | 317  | 171  | -671 | $^7F_2$   | 857       | 860         | 0, 1   | $B_{43}^i = 974 (942)$                                                       |
| $B_{42}^r$ | -101 | -94  | -553 | -141 |           |           |             |        |                                                                              |
| $B_{42}^i$ | 440  | 430  | -13  | 592  | $^7F_2$   | 1280      | 1283        | 1, -1  | $B_{43}^i = 974 (942)$                                                       |
| $B_{43}^r$ | 146  | 124  | 412  | 55   |           |           |             |        |                                                                              |
| $B_{43}^i$ | 752  | 746  | 270  | 449  | $^7F_3$   | 1859      | 1863        | 0, 1   | $B_{64}^i = -1012 (358)$                                                     |
| $B_{44}^r$ | 48   | 29   | 755  | 455  |           |           |             |        |                                                                              |
| $B_{44}^i$ | -655 | -628 | -5   | -317 | $^7F_3$   | 1944      | 1942        | 1, -1  | $B_{64}^i = -1012 (358)$                                                     |
| $B_{60}$   | 45   | 103  | -382 | -364 |           |           |             |        |                                                                              |
| $B_{61}^r$ | -219 | -476 | 325  | -477 | $^7F_3$   | 2000      | 2001        | 0, 1   | $B_{64}^i = -1012 (358)$                                                     |
| $B_{61}^i$ | -202 | -443 | -54  | -137 |           |           |             |        |                                                                              |
| $B_{62}^r$ | 135  | 290  | 7    | -402 | $^7F_3$   | 2139      | 2137        | -2, -1 | $B_{61}^i = -287 (-381),$<br>$B_{64}^i = -1027 (364)$                        |
| $B_{62}^i$ | -194 | -414 | -511 | 318  |           |           |             |        |                                                                              |
| $B_{63}^r$ | -55  | -111 | 162  | 282  | $^7F_4$   | 2466      | 2474        | 0, -1  | $B_{61}^i = -267 (-324),$<br>$B_{62}^i = -282 (-442),$                       |
| $B_{63}^i$ | -3   | 10   | 302  | 266  |           |           |             |        |                                                                              |
| $B_{64}^r$ | -66  | -141 | -157 | -234 | $^7F_4$   | 2466      | 2474        | 0, -1  | $B_{61}^i = -267 (-324),$<br>$B_{62}^i = -282 (-442),$                       |
| $B_{64}^i$ | -977 | 244  | 322  | 236  |           |           |             |        |                                                                              |

|            |      |      |      |       |           |       |       |        |                           |
|------------|------|------|------|-------|-----------|-------|-------|--------|---------------------------|
| $B_{65}^r$ | -176 | -375 | 221  | -393  |           |       |       |        | $B_{64}^i = -1027$ (264)  |
| $B_{65}^i$ | -84  | -204 | -197 | 346   |           |       |       |        |                           |
| $B_{66}^r$ | -211 | -477 | 610  | -200  |           | 2776  | 2771  | -3, 3  | $B_{61}^i = -226$ (-478), |
| $B_{66}^i$ | 33   | 88   | 197  | -207  |           | -     | 2880  | -3, 2  | $B_{64}^i = -1008$ (308)  |
| $S_2$      | 327  | 328  | 327  | 327   |           | 2893  | 2893  | -1, 1  |                           |
| $S_4$      | 554  | 555  | 554  | 554   |           | 2995  | 2995  | -2, -3 |                           |
| $S_6$      | 429  | 428  | 427  | 428   |           | 3055  | 3056  | 2, -3  |                           |
|            |      |      |      |       |           | 3099  | 3095  | 1, -1  |                           |
|            |      |      |      |       |           | -     | 3098  | 1, -1  |                           |
|            |      |      |      |       |           | 3190  | 3192  | 0, 1   |                           |
|            |      |      |      |       | ${}^5D_0$ | 17198 | 17200 | 0, 0   |                           |
|            |      |      |      |       | ${}^5D_1$ | 18944 | 18946 | -1, 1  | $B_{22}^i = -74$ (-92)    |
|            |      |      |      | 18954 |           | 18957 | 1, -1 |        |                           |
|            |      |      |      | 18958 |           | 18960 | 0, 1  |        |                           |
|            |      |      |      |       | ${}^5D_2$ | 21343 | 21344 | -2, 2  |                           |
|            |      |      |      | 21354 |           | 21357 | -1, 2 |        |                           |
|            |      |      |      | 21425 |           | 21427 | 1, -1 |        |                           |
|            |      |      |      | 21456 |           | 21457 | 0, 1  |        |                           |
|            |      |      |      | 21470 |           | 21472 | 2, 0  |        |                           |

\* The rhombicity ratio  $\kappa = B_{22}^r/B_{20}$  is: 0.11 (b'), 0.22 (c'). The Euler angles are:  $\alpha = 63.21$ ,  $\beta = 33.42$ ,  $\gamma = 35.36$  (b');  $\alpha = 102.01$ ,  $\beta = -99.21$ ,  $\gamma = 74.33$  (c') (all in degree).

**Table S7** YBO<sub>3</sub>:Eu<sup>3+</sup>: (a) Allowed crystal-field parameter (CFPs) for the triclinic  $C_i$  point symmetry at Eu<sup>3+</sup> site; the calculated CFPs values (cm<sup>-1</sup>) employing: (b) the ECM method and (c) the SPM method along with the rotational invariants,  $S_k$ ; triclinic ECM/CFPs and SPM/CFPs standardized using the package 3DD - (b') and (c'); (d)  ${}^{2S+1}L_J$  multiplets of Eu<sup>3+</sup> ion; (e) experimental<sup>15</sup> and (f) calculated energy (cm<sup>-1</sup>) levels; (g) the largest and second largest  $M_J$  values of the  $|{}^{2S+1}L_J, M_J\rangle$  levels; and (h) varied values of ECM (SPM)/CFPs are tabulated

| CFPs       |       |       |      |       | Multiplet | $E_{\text{exp}}$ | $E_i^{\text{cal}}$ | $M_J$ | Varied ECM (SPM)/<br>CFPs                                                 |
|------------|-------|-------|------|-------|-----------|------------------|--------------------|-------|---------------------------------------------------------------------------|
|            | ECM   | SPM   | 3DD* |       |           |                  |                    |       |                                                                           |
| (a)        | (b)   | (c)   | (b') | (c')  | (d)       | (e)              | (f)                | (g)   | (h)                                                                       |
| $B_{20}$   | 154   | 157   | -674 | -669  | ${}^7F_0$ | 0                | 0                  | 0     |                                                                           |
| $B_{21}^r$ | 124   | 254   | 0    | 0     | ${}^7F_1$ | 320              | 316                | -1, 1 | $B_{20} = 90$ (87),<br>$B_{21}^i = -36$ (-24),<br>$B_{22}^i = -298$ (274) |
| $B_{21}^i$ | -75   | -54   | 0    | 0     |           | 352              | 356                | 0     |                                                                           |
| $B_{22}^r$ | 261   | 240   | -208 | -217  |           | 408              | 409                | 1, -1 |                                                                           |
| $B_{22}^i$ | -412  | 366   | 0    | 0     | ${}^5D_0$ | 17246            | 17251              | 0, 6  |                                                                           |
| $B_{40}$   | -741  | -781  | 499  | -266  | ${}^5D_1$ | 18949            | 18950              | 1, -1 | $B_{22}^i = -374$ (323)                                                   |
| $B_{41}^r$ | -185  | -153  | 409  | -142  |           | 18963            | 18964              | 0, -1 |                                                                           |
| $B_{41}^i$ | -368  | -354  | -604 | 1071  |           | 18974            | 18977              | -1, 1 |                                                                           |
| $B_{42}^r$ | 485   | 481   | 18   | 378   |           |                  |                    |       |                                                                           |
| $B_{42}^i$ | -1433 | -1427 | 1041 | -547  |           |                  |                    |       |                                                                           |
| $B_{43}^r$ | -431  | -412  | 233  | -1103 |           |                  |                    |       |                                                                           |
| $B_{43}^i$ | -825  | -806  | 10   | -706  |           |                  |                    |       |                                                                           |
| $B_{44}^r$ | -119  | -77   | 219  | -642  |           |                  |                    |       |                                                                           |
| $B_{44}^i$ | 488   | 547   | 1417 | -273  |           |                  |                    |       |                                                                           |
| $B_{60}$   | -273  | -306  | 63   | 48    |           |                  |                    |       |                                                                           |
| $B_{61}^r$ | -136  | -144  | -377 | 246   |           |                  |                    |       |                                                                           |
| $B_{61}^i$ | 240   | 270   | 193  | 333   |           |                  |                    |       |                                                                           |
| $B_{62}^r$ | 352   | 407   | -268 | -459  |           |                  |                    |       |                                                                           |
| $B_{62}^i$ | 156   | 191   | 398  | 612   |           |                  |                    |       |                                                                           |
| $B_{63}^r$ | -443  | -505  | -223 | -325  |           |                  |                    |       |                                                                           |
| $B_{63}^i$ | 135   | 180   | 382  | -159  |           |                  |                    |       |                                                                           |
| $B_{64}^r$ | -38   | -41   | -267 | 192   |           |                  |                    |       |                                                                           |
| $B_{64}^i$ | 728   | -504  | 522  | 284   |           |                  |                    |       |                                                                           |
| $B_{65}^r$ | -317  | -386  | -569 | -421  |           |                  |                    |       |                                                                           |
| $B_{65}^i$ | 355   | 388   | -88  | 289   |           |                  |                    |       |                                                                           |

|            |      |      |     |     |
|------------|------|------|-----|-----|
| $B_{66}^r$ | -425 | -483 | 335 | 392 |
| $B_{66}^i$ | -100 | -104 | 170 | 95  |
| $S_2$      | 329  | 329  | 329 | 329 |
| $S_4$      | 924  | 924  | 925 | 924 |
| $S_6$      | 468  | 469  | 468 | 469 |

\*The rhombicity ratio  $\kappa = B_{22}^r/B_{20}$  is: 0.31 (b'), 0.32 (c'). The Euler angles are:  $\alpha = 118.75$ ,  $\beta = -90.52$ ,  $\gamma = -22.04$  (b');  $\alpha = 58.35$ ,  $\beta = -104.88$ ,  $\gamma = 148.31$  (c') (all in degree).

**Table S8** The spherical polar coordinates ( $R_h$ ,  $\theta_h$ ,  $\phi_h$ ) for the  $O^{2-}$  ligands around the metal center having site symmetry,  $C_1$  and  $C_i$ , in the distorted  $YO_8$  polyhedron in  $YBO_3$  host crystal<sup>41</sup> obtained in the CAS\* ( $a^*/X$ ,  $b//Y$ ,  $c//Z$ ); see, the text

| O <sup>2-</sup><br>ion | YBO <sub>3</sub> |                |              |                |                |              |
|------------------------|------------------|----------------|--------------|----------------|----------------|--------------|
|                        | C <sub>1</sub>   |                |              | C <sub>i</sub> |                |              |
|                        | $R_h$ (Å)        | $\theta_h$ (°) | $\phi_h$ (°) | $R_h$ (Å)      | $\theta_h$ (°) | $\phi_h$ (°) |
| O1                     | 2.4667           | 92.116         | -152.660     | 2.3001         | 47.4204        | -139.8420    |
| O1'                    | 2.4038           | 70.053         | -78.965      | 2.3001         | 132.5796       | 40.1580      |
| O2                     | 2.4448           | 132.904        | -37.346      | 2.4287         | 67.5325        | 82.2336      |
| O2'                    | 2.2762           | 85.160         | 26.372       | 2.4287         | 112.4675       | -97.7664     |
| O3                     | 2.2285           | 112.706        | 100.663      | 2.4332         | 92.9205        | 150.1370     |
| O3'                    | 2.4063           | 48.667         | 139.640      | 2.4332         | 87.0795        | -29.8630     |
| O4                     | 2.2929           | 12.240         | -61.156      | 2.3685         | 139.3940       | -165.5032    |
| O5                     | 2.3329           | 150.135        | -139.140     | 2.3685         | 40.6060        | 14.4968      |

**Table S9** ZnO:Eu<sup>3+</sup>: (a) Allowed crystal-field parameters (CFPs) for the triclinic  $C_1$  point symmetry at the B-site of Eu<sup>3+</sup>; the calculated CFPs values (cm<sup>-1</sup>) employing: (b) the ECM method, and (c) the SPM method for the original trigonal  $C_{3v}$  symmetry along with the rotational invariants,  $S_k$ ; (d) adopted CFP values for lower  $C_1$  point symmetry - see the text; (d') triclinic ECM/CFPs standardized using 3DD package; (e) <sup>2S+1</sup>L<sub>J</sub> multiplets of Eu<sup>3+</sup> ion; (f) experimental energy (cm<sup>-1</sup>) levels,<sup>16</sup> calculated energy (cm<sup>-1</sup>) levels, respectively for: (g)  $C_{3v}$  symmetry using the CFPs (see, b and/or c), and (h)  $C_1$  symmetry; and (i) the varied ECM/CFPs are tabulated

| CFPs       |      |       |      |          | Multiplet | $E_{\text{exp}}$ | $E_i^{\text{cal}}$                                         |                                                                  | Varied<br>ECM/ CFPs |
|------------|------|-------|------|----------|-----------|------------------|------------------------------------------------------------|------------------------------------------------------------------|---------------------|
| $C_{3v}$   |      | $C_1$ |      | $C_{3v}$ |           |                  | $C_1$                                                      |                                                                  |                     |
|            | ECM  | SPM   | ECM  | 3DD*     |           |                  |                                                            |                                                                  |                     |
| (a)        | (b)  | (c)   | (d)  | (d')     | (e)       | (f)              | (g)                                                        | (h)                                                              | (i)                 |
| $B_{20}$   | -369 | -370  | -369 | -551     | ${}^7F_0$ | 0                | 0                                                          | 0                                                                |                     |
| $B_{21}^r$ |      |       | 214  | 0        | ${}^7F_1$ | 318              | 292                                                        | 314                                                              | $B_{20} = -198$     |
| $B_{21}^i$ |      |       | -183 | 0        |           | 351              | 410                                                        | 353                                                              | $B_{21}^i = -81$    |
| $B_{22}^r$ |      |       | 111  | -109     |           | 452              | 410                                                        | 449                                                              |                     |
| $B_{22}^i$ |      |       | 64   | 0        | ${}^7F_2$ | 851              | 732                                                        | 849, 906, 966,<br>1161, 1242                                     | $B_{20} = -210$     |
| $B_{40}$   | 1884 | 1930  | 1884 | 419      |           | 909              | 765, 765,                                                  |                                                                  | $B_{40} = 1330$     |
| $B_{41}^r$ |      |       | 563  | -212     |           | 969              | 1433, 1433                                                 |                                                                  | $B_{43}^r = 1496$   |
| $B_{41}^i$ |      |       | 178  | 938      |           | 1162             |                                                            |                                                                  |                     |
| $B_{42}^r$ |      |       | -244 | 374      |           | 1238             |                                                            |                                                                  |                     |
| $B_{42}^i$ |      |       | 67   | 1831     | ${}^7F_3$ | 1882             | 1805, 1805, 1885,<br>1994, 2016, 2016,<br>2192             | 1843, 1877,<br>1935, 1963,<br>2006, 2063,<br>2240                | $B_{60} = 987$      |
| $B_{43}^r$ | 2025 | 2004  | 2025 | -201     |           | 1931             |                                                            |                                                                  | $B_{62}^r = 323$    |
| $B_{43}^i$ |      |       | 24   | -554     |           | 1961             |                                                            |                                                                  |                     |
| $B_{44}^r$ |      |       | 251  | 1026     |           | 2003             |                                                            |                                                                  |                     |
| $B_{44}^i$ |      |       | -52  | -672     | ${}^7F_4$ | 2844             | 2351, 2853, 2862,<br>2862, 3136, 3136,<br>3207, 3207, 3224 | 2419, 2841,<br>2851, 2992,<br>3120, 3177,<br>3206, 3211,<br>3296 |                     |
| $B_{60}$   | 1128 | 1091  | 1128 | -917     |           | 2994             |                                                            |                                                                  |                     |
| $B_{61}^r$ |      |       | 157  | 578      |           | 3118             |                                                            |                                                                  |                     |
| $B_{61}^i$ |      |       | 13   | 56       | ${}^5D_0$ | 17135            | 17132                                                      | 17133                                                            |                     |
| $B_{62}^r$ |      |       | 220  | -30      | ${}^5D_1$ | 18880            | 18879, 18912,<br>18912                                     | 18880, 18912,<br>18911                                           | $B_{21}^r = 175$    |
| $B_{62}^i$ |      |       | -2   | 285      |           |                  |                                                            |                                                                  | $B_{22}^r = 152$    |
| $B_{63}^r$ | -765 | -810  | -765 | -410     | ${}^5D_2$ | 21292            | 21326, 21326,<br>21414, 21417,<br>21417,                   | 21293, 21304,<br>21379, 21391,<br>21407                          | $B_{41}^r = 104$    |
| $B_{63}^i$ |      |       | 17   | -59      |           | 21377            |                                                            |                                                                  |                     |
| $B_{64}^r$ |      |       | 7    | -526     |           | 21406            |                                                            |                                                                  |                     |
| $B_{64}^i$ |      |       | -78  | 468      | ${}^5D_3$ | 24195            | 24233, 24246,<br>24259, 24259,<br>24303, 24309,            | 24185, 24193,<br>24209, 24211,<br>24251, 24255,                  | $B_{61}^r = 120$    |
| $B_{65}^r$ |      |       | -134 | 175      |           |                  |                                                            |                                                                  | $B_{62}^r = 182$    |



|            |      |      |      |      |           |       |                                                                                                             |                                                                                                             |  |
|------------|------|------|------|------|-----------|-------|-------------------------------------------------------------------------------------------------------------|-------------------------------------------------------------------------------------------------------------|--|
| $B_{65}^i$ |      |      | 10   | -362 |           |       | 24309                                                                                                       | 24257                                                                                                       |  |
| $B_{66}^r$ | 875  | 859  | 875  | -564 |           |       |                                                                                                             |                                                                                                             |  |
| $B_{66}^i$ |      |      | -20  | -315 | ${}^5L_6$ | 24616 | 24693, 24696,<br>24696, 24711,<br>24711, 24720,<br>25350, 25350,<br>25383, 25422,<br>25422, 25451,<br>25545 | 24607, 24612,<br>24618, 24622,<br>24626, 24634,<br>25028, 25165,<br>25266, 25300,<br>25310, 25330,<br>25422 |  |
| $S_2$      | 165  | 165  | 256  | 256  |           | 25027 |                                                                                                             |                                                                                                             |  |
| $S_4$      | 1143 | 1143 | 1188 | 1188 |           | 25162 |                                                                                                             |                                                                                                             |  |
| $S_6$      | 553  | 553  | 567  | 566  |           |       |                                                                                                             |                                                                                                             |  |
|            |      |      |      |      |           |       |                                                                                                             |                                                                                                             |  |

\*The rhombicity ratio  $\kappa = B_{22}^r/B_{20}$  is: 0.197 (d'). The Euler angles are:  $\alpha = 51.01$ ,  $\beta = 28.26$ ,  $\gamma = 42.02$  (d') (all in degree).

**Table S10** The spherical polar coordinates ( $R_h$ ,  $\theta_h$ ,  $\phi_h$ ) for the  $O^{2-}$  ligands around  $Zn^{2+}$  center in the distorted  $ZnO_4$  tetrahedron having  $C_{3v}$  symmetry in ZnO

| $O^{2-}$<br>ion | ZnO       |                |              |
|-----------------|-----------|----------------|--------------|
|                 | $R_h$ (Å) | $\theta_h$ (°) | $\phi_h$ (°) |
| O1              | 2.001     | 0              | 0            |
| O2              | 1.9735    | 107.8325       | 120          |
| O3              | 1.9735    | 107.8325       | 240          |
| O4              | 1.9735    | 107.8325       | 0            |

**Table S11** ZnO:Eu<sup>3+</sup>: (a) Allowed crystal-field parameters (CFPs) for the triclinic  $C_1$  point symmetry at the A-site of Eu<sup>3+</sup>; (b) the adopted CFPs values (cm<sup>-1</sup>) for  $C_1$  symmetry -see, the text; (c)  ${}^{25+1}L_J$  multiplets of Eu<sup>3+</sup> ion; energy levels: (d) experimental,<sup>16</sup> and (e) calculated (cm<sup>-1</sup>); (f) the varied CFPs are tabulated

| CFPs       |      | Multiplets | $E_{exp}$ | $E_i^{cal}$ | Varied CFPs                     |     |
|------------|------|------------|-----------|-------------|---------------------------------|-----|
| $C_1$      |      |            |           |             |                                 |     |
| (a)        | (b)  | (c)        | (d)       | (e)         | (f)                             |     |
| $B_{20}$   | -369 | ${}^7F_0$  | 0         | 0           | $B_{20} = -222, B_{21}^i = -95$ |     |
| $B_{21}^r$ | 214  |            | ${}^7F_1$ | 299         |                                 | 298 |
| $B_{21}^i$ | -183 |            |           | 369         |                                 | 371 |
|            |      |            | 446       | 443         |                                 |     |

|            |      |           |                                |                                                                                                    |                                                      |
|------------|------|-----------|--------------------------------|----------------------------------------------------------------------------------------------------|------------------------------------------------------|
| $B_{22}^r$ | 111  | ${}^7F_2$ | 993                            | 809, 863, 991, 1085, 1176                                                                          | $B_{20} = -265, B_{40} = 1470,$<br>$B_{43}^r = 1966$ |
| $B_{22}^i$ | 64   |           |                                |                                                                                                    |                                                      |
| $B_{40}$   | 1884 | ${}^7F_3$ | 1887                           | 1783, 1815, 1890, 1950, 1997,<br>2055, 2126                                                        | $B_{60} = 1016, B_{62}^r = 304$                      |
| $B_{41}^r$ | 563  |           |                                |                                                                                                    |                                                      |
| $B_{41}^i$ | 178  | ${}^7F_4$ | 2713<br>2921                   | 2312, 2714, 2797, 2919, 3032,<br>3093, 3152, 3180, 3211                                            |                                                      |
| $B_{42}^r$ | -244 |           |                                |                                                                                                    |                                                      |
| $B_{42}^i$ | 67   | ${}^5D_0$ | 17271                          | 17274                                                                                              |                                                      |
| $B_{43}^r$ | 2025 |           |                                |                                                                                                    |                                                      |
| $B_{43}^i$ | 24   | ${}^5D_1$ | 19001                          | 18996, 19003, 19020                                                                                | $B_{21}^r = 188, B_{22}^r = 144$                     |
| $B_{44}^r$ | 251  |           |                                |                                                                                                    |                                                      |
| $B_{44}^i$ | -52  | ${}^5D_2$ | 21515                          | 21482, 21517, 21545, 21565,<br>21576                                                               | $B_{41}^r = 115$                                     |
| $B_{60}$   | 1128 |           |                                |                                                                                                    |                                                      |
| $B_{61}^r$ | 157  | ${}^5L_6$ | 25368<br>[25380] <sup>a)</sup> | 25000, 25008, 25022, 25047,<br>25061, 25090, 25371, 25402,<br>25692, 25708, 25717, 25756,<br>25831 | $B_{61}^r = 129, B_{62}^r = 194$                     |
| $B_{61}^i$ | 13   |           |                                |                                                                                                    |                                                      |
| $B_{62}^r$ | 220  | ${}^5L_6$ | 25368<br>[25380] <sup>a)</sup> | 25000, 25008, 25022, 25047,<br>25061, 25090, 25371, 25402,<br>25692, 25708, 25717, 25756,<br>25831 | $B_{61}^r = 129, B_{62}^r = 194$                     |
| $B_{62}^i$ | -2   |           |                                |                                                                                                    |                                                      |
| $B_{63}^r$ | -765 | ${}^5L_6$ | 25368<br>[25380] <sup>a)</sup> | 25000, 25008, 25022, 25047,<br>25061, 25090, 25371, 25402,<br>25692, 25708, 25717, 25756,<br>25831 | $B_{61}^r = 129, B_{62}^r = 194$                     |
| $B_{63}^i$ | 17   |           |                                |                                                                                                    |                                                      |
| $B_{64}^r$ | 7    | ${}^5L_6$ | 25368<br>[25380] <sup>a)</sup> | 25000, 25008, 25022, 25047,<br>25061, 25090, 25371, 25402,<br>25692, 25708, 25717, 25756,<br>25831 | $B_{61}^r = 129, B_{62}^r = 194$                     |
| $B_{64}^i$ | -78  |           |                                |                                                                                                    |                                                      |
| $B_{65}^r$ | -134 | ${}^5L_6$ | 25368<br>[25380] <sup>a)</sup> | 25000, 25008, 25022, 25047,<br>25061, 25090, 25371, 25402,<br>25692, 25708, 25717, 25756,<br>25831 | $B_{61}^r = 129, B_{62}^r = 194$                     |
| $B_{65}^i$ | 10   |           |                                |                                                                                                    |                                                      |
| $B_{66}^r$ | 875  | ${}^5L_6$ | 25368<br>[25380] <sup>a)</sup> | 25000, 25008, 25022, 25047,<br>25061, 25090, 25371, 25402,<br>25692, 25708, 25717, 25756,<br>25831 | $B_{61}^r = 129, B_{62}^r = 194$                     |
| $B_{66}^i$ | -20  |           |                                |                                                                                                    |                                                      |

a)  ${}^5L_6 \rightarrow {}^7F_0$  transition energy in ZnO:Eu<sup>3+</sup> is 3.147 eV = 25380 cm<sup>-1</sup> [16]

**Table S12**  $\text{YAl}_3(\text{BO}_3)_4:\text{Eu}^{3+}$ : (a) Allowed crystal-field parameters (CFPs) for the trigonal  $D_3$  point symmetry at  $\text{Eu}^{3+}$  site; the calculated CFPs values obtained using: (b) the LSC method<sup>11</sup> and (c) ADS method;<sup>11</sup> and (d) the ECM and (e) SPM method along with the rotational invariants,  $S_k$ ; (f)  $^{2S+1}L_J$  multiplets of  $\text{Eu}^{3+}$  ion; (g) experimental energy ( $\text{cm}^{-1}$ ) levels;<sup>11</sup> (h) calculated energy ( $\text{cm}^{-1}$ ) levels using the ECM/CFPs; and (i) the largest and second largest  $M_J$  values of the  $|^{2S+1}L_J, M_J\rangle$  levels are tabulated

| CFPs       |       |       |       |       | Multiplet | $E_{\text{exp}}$ | $E_i^{\text{cal}}$ | $M_J$              |
|------------|-------|-------|-------|-------|-----------|------------------|--------------------|--------------------|
| LSC        | ADS   | ECM   | SPM   | (a)   |           |                  |                    |                    |
| (a)        | (b)   | (c)   | (d)   | (e)   | (f)       | (g)              | (h)                | (i)                |
| $B_{20}$   | 467   | 493   | 407   | 408   | $^7F_0$   | 0 ( $A_1$ )      | 0                  | 0                  |
| $B_{40}$   | -1007 | -1809 | -1372 | -1338 | $^7F_1$   | 323 (E)          | 325 (E)            | ( $\pm 1, \mp 1$ ) |
| $B_{43}^r$ | -936  | -677  | -943  | -965  |           | 453 ( $A_2$ )    | 450                | 0                  |
| $B_{60}$   | 516   | -488  | 565   | 562   |           | 931 (E)          | 930 (E)            | ( $\mp 1, \mp 2$ ) |
| $B_{63}^r$ | 1902  | 788   | 57    | 54    | $^7F_2$   | 1049 (E)         | 1049 (E)           | ( $\pm 2, \mp 1$ ) |
| $B_{66}^r$ | 520   | 860   | -230  | -240  |           | ---              | 1204               | (0, 3)             |
| $S_2$      | 208   | 220   | 182   | 182   |           | 1821 ( $A_2$ )   | 1821               | (-3, 3)            |
| $S_4$      | 554   | 682   | 638   | 637   |           | ---              | 1901               | (3, -3)            |
| $S_6$      | 786   | 477   | 182   | 183   | $^7F_3$   | 1939 (E)         | 1938 (E)           | ( $\pm 1, \mp 1$ ) |
|            |       |       |       |       |           | 1965 (E)         | 1964 (E)           | ( $\mp 2, \pm 1$ ) |
|            |       |       |       |       |           | 2063 ( $A_2$ )   | 2058               | (0, -3)            |
|            |       |       |       |       |           | 2536 (E)         | 2540               | (0, -3)            |
|            |       |       |       |       |           | 2596 (E)         | 2606 (E)           | ( $\pm 4, \pm 1$ ) |
|            |       |       |       |       | $^7F_4$   | ---              | 2766 (E)           | ( $\mp 1, \pm 1$ ) |
|            |       |       |       |       |           | 2907 ( $A_2$ )   | 2908               | (3, -3)            |
|            |       |       |       |       |           | --               | 3003               | (-3, 3)            |
|            |       |       |       |       |           | 3009 (E)         | 3011 (E)           | ( $\mp 2, \pm 2$ ) |

|  |  |  |  |  |                        |                               |                         |           |          |
|--|--|--|--|--|------------------------|-------------------------------|-------------------------|-----------|----------|
|  |  |  |  |  |                        | 3804 (E)                      | (±5, ∓5)                |           |          |
|  |  |  |  |  |                        | 3820                          | (0, -3)                 |           |          |
|  |  |  |  |  |                        | 3823 (E)                      | (±1, ∓1)                |           |          |
|  |  |  |  |  |                        | 3889 (E)                      | (∓2, ∓5)                |           |          |
|  |  |  |  |  |                        | 3983                          | (-3, 3)                 |           |          |
|  |  |  |  |  | 3997 (A <sub>2</sub> ) | 4000                          | (3, -3)                 |           |          |
|  |  |  |  |  | 4092 (E)               | 4089 (E)                      | (∓4, ∓1)                |           |          |
|  |  |  |  |  |                        | 4863 (E)                      | (∓4, ∓1)                |           |          |
|  |  |  |  |  |                        | ---                           | (3, -3)                 |           |          |
|  |  |  |  |  |                        | 4893 (E)                      | (∓2, ∓5)                |           |          |
|  |  |  |  |  |                        | 4905 (A <sub>2</sub> )        | (-3, 3)                 |           |          |
|  |  |  |  |  |                        | ----                          | (0, 3)                  |           |          |
|  |  |  |  |  |                        | 5087 (E)                      | (∓1, ∓4)                |           |          |
|  |  |  |  |  |                        | 5166 (E)                      | (±5, ±2)                |           |          |
|  |  |  |  |  |                        | 5353 (A <sub>2</sub> )        | (6, -6)                 |           |          |
|  |  |  |  |  |                        | ---                           | (-6, 6)                 |           |          |
|  |  |  |  |  |                        | 5 <sup>5</sup> D <sub>0</sub> | 17215 (A <sub>1</sub> ) | 17219     | 0        |
|  |  |  |  |  |                        | 5 <sup>5</sup> D <sub>1</sub> | 18965 (E)               | 18966 (E) | (±1, ∓1) |
|  |  |  |  |  |                        |                               | 19001 (A <sub>2</sub> ) | 19002     | (0, 6)   |
|  |  |  |  |  |                        | 5 <sup>5</sup> D <sub>2</sub> | 21415 (A <sub>1</sub> ) | 21414     | (0, -3)  |
|  |  |  |  |  |                        |                               | 21418 (E)               | 21420 (E) | (±2, ∓1) |
|  |  |  |  |  |                        |                               | 21489 (E)               | 21490 (E) | (∓1, ±2) |
|  |  |  |  |  |                        | 5 <sup>5</sup> D <sub>3</sub> | 24235 (E)               | 24237 (E) | (∓1, ±2) |
|  |  |  |  |  |                        |                               | 24292 (E)               | 24298 (E) | (∓2, ±1) |
|  |  |  |  |  |                        |                               | 24344 (A <sub>2</sub> ) | 24347     | (0, -3)  |
|  |  |  |  |  |                        |                               | 24405 (A <sub>1</sub> ) | 24402     | (-3, 3)  |
|  |  |  |  |  |                        |                               | 24618 (A <sub>2</sub> ) | 24614     | (0, 3)   |

|  |  |  |  |  |                             |                         |           |                     |
|--|--|--|--|--|-----------------------------|-------------------------|-----------|---------------------|
|  |  |  |  |  |                             | 24877 (A <sub>2</sub> ) | 24877     | (6, -6)             |
|  |  |  |  |  |                             | ---                     | 24893     | (-6, 6)             |
|  |  |  |  |  |                             | 24934 (E)               | 24937     | (0, 6)              |
|  |  |  |  |  | <sup>5</sup> L <sub>6</sub> | 25026 (E)               | 24939 (E) | ( $\mp$ 1, $\pm$ 2) |
|  |  |  |  |  |                             | 25117 (E)               | 25013 (E) | ( $\pm$ 3, $\pm$ 5) |
|  |  |  |  |  |                             | 25215 (A <sub>2</sub> ) | 25225     | (3, -3)             |
|  |  |  |  |  |                             | ----                    | 25262     | (-3, 3)             |
|  |  |  |  |  |                             | ----                    | 25338 (E) | ( $\mp$ 4, $\mp$ 1) |
|  |  |  |  |  |                             | 25341 (E)               | 25346 (E) | ( $\mp$ 5, $\mp$ 2) |

**Table S13** The spherical polar coordinates ( $R_h$ ,  $\theta_h$ ,  $\phi_h$ ) for the O<sup>2-</sup> ligands around metal center in the distorted trigonal (D<sub>3</sub>) YO<sub>6</sub> polyhedron in YAl<sub>3</sub>(BO<sub>3</sub>)<sub>4</sub>;  $\Phi$  (= 8°) is the distortion angle. For explanations, see, text

| O <sup>2-</sup><br>ion | YAl <sub>3</sub> (BO <sub>3</sub> ) <sub>4</sub> |                |              |
|------------------------|--------------------------------------------------|----------------|--------------|
|                        | $R_h$ (Å)                                        | $\theta_h$ (°) | $\phi_h$ (°) |
| O1                     | 2.154                                            | 60.76          | 90 + $\Phi$  |
| O1'                    | 2.154                                            | 119.24         | 90 - $\Phi$  |
| O2                     | 2.154                                            | 60.76          | 210 + $\Phi$ |
| O2'                    | 2.154                                            | 119.24         | 210 - $\Phi$ |
| O3                     | 2.154                                            | 60.76          | 330 + $\Phi$ |
| O3'                    | 2.154                                            | 119.24         | 330 - $\Phi$ |

**References:** (see main text)
